# Supplementary material
Source: publisher figshare collection journal article supplement (https://sage.figshare.com/ndownloader/files/15352652)
Supplement: Supplementary file 1 [file 15352652]

# Appendix 1: Table of interviewees with pseudonyms

| Pseudonym                                       | Position and Organisation                              | Interview Date |
|-------------------------------------------------|--------------------------------------------------------|----------------|
| <b>Government of Indonesia</b>                  |                                                        |                |
| GA                                              | National Director - Climate Change Coordinating Agency | June 2012      |
| GB                                              | Deputy Director - Climate Change Coordinating Agency   | February 2012  |
| GC                                              | Section Secretary -Climate Change Coordinating Agency  | February 2012  |
| GD                                              | Section Secretary - Climate Change Coordinating Agency | February 2012  |
| GE                                              | Program Manager – President’s Office                   | February 2012  |
| GF                                              | Director – Line Ministry                               | March 2012     |
| GG                                              | Director – Line Ministry                               | March 2012     |
| GH                                              | Manager – Line Ministry                                | June 2012      |
| <b>Multilateral Organisations</b>               |                                                        |                |
| MI                                              | SE Asia Director - Multilateral REDD+ Program          | March 2012     |
| MJ                                              | National Director - Multilateral REDD+ Program         | February 2012  |
| MK                                              | National Team Leader - Multilateral REDD+ Program      | February 2012  |
| ML                                              | Chief Technical Advisor - Multilateral REDD+ Program   | February 2012  |
| MM                                              | Project Manager - Multilateral Development Agency      | February 2012  |
| MN                                              | Program Officer - Multilateral Development Agency      | February 2012  |
| <b>Bilateral Governments</b>                    |                                                        |                |
| BO                                              | Team Leader - Bilateral REDD+ Program                  | March 2012     |
| BP                                              | Team Leader - Bilateral REDD+ program                  | February 2012  |
| BQ                                              | Project Manager Bilateral REDD+ Partnership            | February 2012  |
| BR                                              | Project Specialist - Bilateral REDD+ Partnership       | February 2012  |
| BS                                              | Research Manager- Bilateral REDD+ Partnership          | February 2012  |
| <b>Environment Non Government Organisations</b> |                                                        |                |
| ET                                              | Project Director – National NGO                        | February 2012  |
| EU                                              | Program Director – National NGO                        | March 2012     |
| EV                                              | Project Advisor – International NGO                    | February 2012  |
| EW                                              | Program Director - International NGO                   | November 2011  |
| EX                                              | Program Coordinator - International NGO                | February 2012  |

|                                            |                                                  |                |
|--------------------------------------------|--------------------------------------------------|----------------|
| EY                                         | Scientist – International NGO                    | September 2011 |
| EZ                                         | Country Director – International NGO (SE Asia)   | January 2012   |
| <b>Researchers and Private Consultants</b> |                                                  |                |
| RCA                                        | Private Consultant – Forest Carbon (Indonesia)   | June 2011      |
| RCB                                        | Research Fellow – REDD+ Indonesia                | August 2011    |
| RCC                                        | Researcher /Private Consultant– REDD+ Indonesia  | December 2011  |
| RCD                                        | Researcher /Private Consultant – REDD+ Indonesia | December 2011  |
